## Correction: The Role of Compensatory Mutations in the Emergence of Drug Resistance

Andreas Handel, Roland R. Regoes, Rustom Antia

doi:10.1371/journal.pcbi.0020137

In *PLoS Computational Biology*, volume 2, issue 10:

Equation 1 contained typographical errors in the first and last lines. The correct equation is as follows:

$$\begin{aligned}\dot{S} &= \lambda N - \lambda S + \sum_{i=1}^3 (v_i - \beta_i \frac{S}{N}) I_i \\ &\quad - \frac{S}{N} (\beta_u I_u + \beta_s I_t) + v_u I_u + v_t I_t \\ \dot{I}_u &= (1-f) \frac{S}{N} \beta_s (I_u + I_t) - (\lambda + v_u) I_u \\ \dot{I}_t &= f \frac{S}{N} \beta_s (I_u + I_t) - (\lambda + v_t + \mu_t) I_t \\ \dot{I}_1 &= \mu_t I_t + (\frac{S}{N} \beta_1 - \lambda - v_1 - \mu_1) I_1 \\ \dot{I}_2 &= \mu_1 I_1 + (\frac{S}{N} \beta_2 - \lambda - v_2 - \mu_2) I_2 \\ \dot{I}_3 &= \mu_2 I_2 + (\frac{S}{N} \beta_3 - \lambda - v_3) I_3.\end{aligned}$$

This correction note may be found online at doi:10.1371/journal.pcbi.0030046.

Published February 23, 2007

Citation: (2007) Correction: The Role of Compensatory Mutations in the Emergence of Drug Resistance. *PLoS Comput Biol* 3(2): e46. doi:10.1371/journal.pcbi.0030046
